# Supplementary material
Source: PubMed Central journal article supplement (PMC4576982)
Supplement: embr0016-1131-sd1.pdf [file embr0016-1131-sd1.pdf]

# Appendix Table of Contents

- **Appendix Figure S1.** Timecourse of di-ubiquitin disassembly with the DUB Usp5.
- **Appendix Figure S2.** Measurement of yeast growth rates.
- **Appendix Figure S3.** Proteins with significantly repressed turnover in S65E ubiquitin mutants.
- **Appendix Table S1.** Yeast strains used in this study.
- **Appendix Table S2.** The effect of H<sub>2</sub>O<sub>2</sub> stress on ubiquitin signaling and cell viability.
- **Appendix Table S3.** Gene ontology enrichment analysis of substrates with accumulated ubiquitylation site in S65E cells.

**Figure S1**

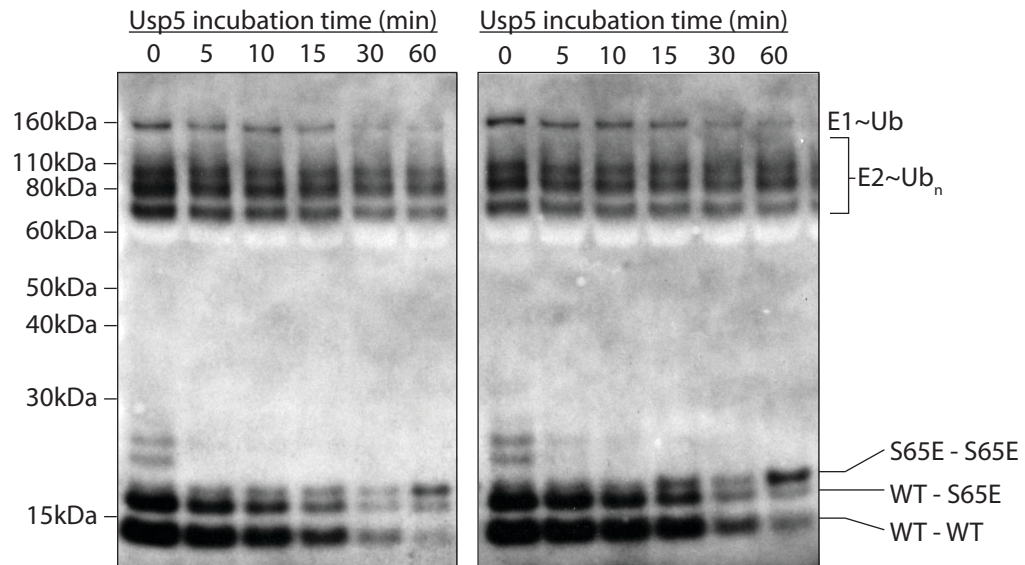

**Timecourse of di-ubiquitin disassembly with the DUB Usp5.**

Anti-ubiquitin immunoblotting of in vitro generated mixed chains comprised of both WT and His-tagged S65E ubiquitin. Chains were subjected to disassembly with Usp5, and the presence of the dimers containing specific linkage type connections was measured over time. Two independent replicate experiments are shown.

**Figure S2**

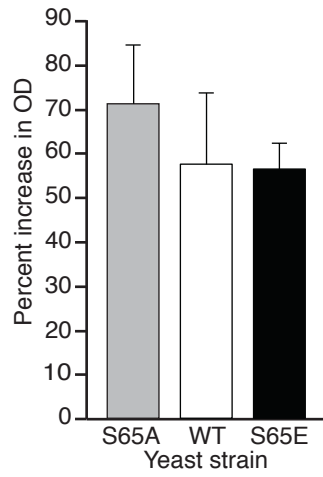

**Measurement of yeast growth rates.**

The percent increase in OD<sub>600</sub> over a 2 h timespan for yeast strains expressing S65A, WT, or S65E ubiquitin (for each strain n = 4).

**Figure S3**

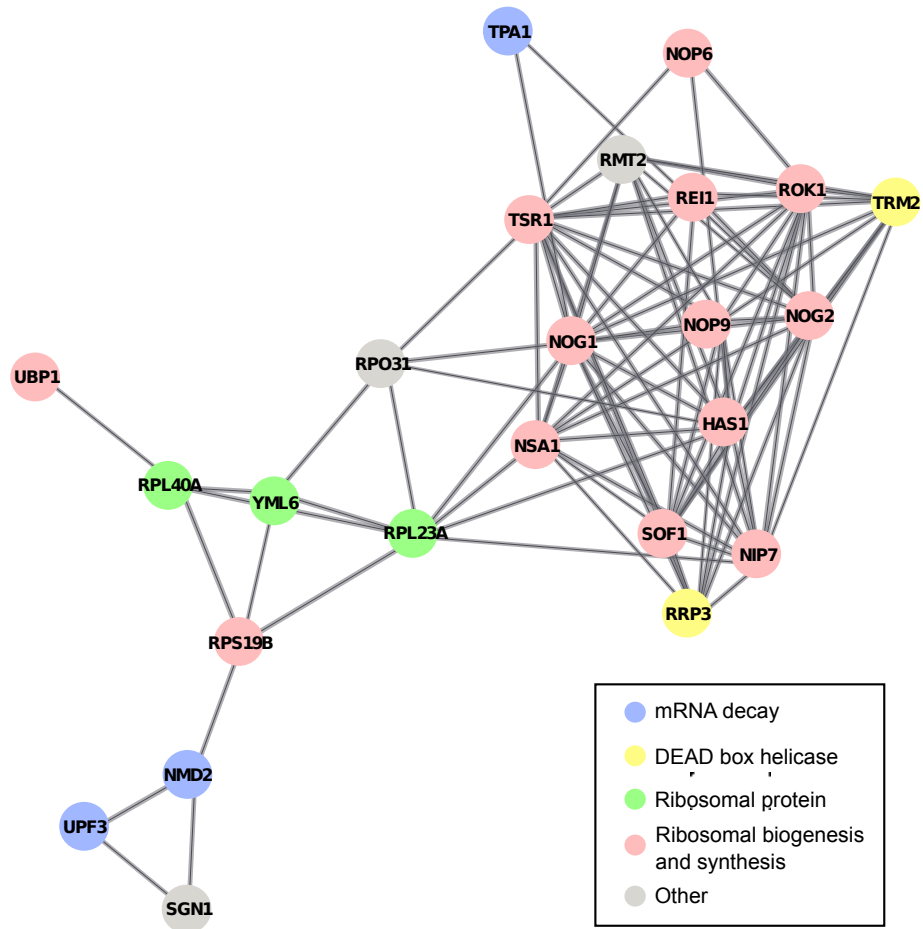

**Proteins with significantly repressed turnover in S65E ubiquitin mutants.** Protein-protein interaction network of proteins with the largest protein turnover delay in S65E ubiquitin mutant cells relative to WT or S65A ubiquitin cells.

**Appendix Table S1. Yeast strains used in this study.**

| Strains | Genotype                                                                                                                                                                      | Ubiquitin expressed in 2 $\mu$ plasmids           | Source or reference | Experiments             |
|---------|-------------------------------------------------------------------------------------------------------------------------------------------------------------------------------|---------------------------------------------------|---------------------|-------------------------|
| LSY207  | MATa lys2-810 leu2-3,-112 ura3-52 his3- $\Delta$ 200 trp1-1[am] ubi1- $\Delta$ 1::TRP1 ubi2- $\Delta$ 2::ura3 ubi3- $\Delta$ ub-2 ubi4- $\Delta$ 2::LEU2 pdr5::KanMX [pUB221] | P <sub>CUP1</sub> -6His-myc-ubiquitin             | 1, 2                | Fig. 4B                 |
| DS147   | MATa lys2-810 leu2-3,-112 ura3-52 his3- $\Delta$ 200 trp1-1[am] ubi1- $\Delta$ 1::TRP1 ubi2- $\Delta$ 2::ura3 ubi3- $\Delta$ ub-2 ubi4- $\Delta$ 2::LEU2 pdr5::KanMX [pUB100] | P <sub>GPD</sub> -ubiquitin (WT)                  | This study          | Fig. 4A, Fig. 5, Fig. 7 |
| DS181   | MATa lys2-810 leu2-3,-112 ura3-52 his3- $\Delta$ 200 trp1-1[am] ubi1- $\Delta$ 1::TRP1 ubi2- $\Delta$ 2::ura3 ubi3- $\Delta$ ub-2 ubi4- $\Delta$ 2::LEU2 pdr5::KanMX [pUB100] | P <sub>GPD</sub> -ubiquitin (S65A)                | This study          | Fig. 4A, Fig. 5, Fig. 7 |
| DS182   | MATa lys2-810 leu2-3,-112 ura3-52 his3- $\Delta$ 200 trp1-1[am] ubi1- $\Delta$ 1::TRP1 ubi2- $\Delta$ 2::ura3 ubi3- $\Delta$ ub-2 ubi4- $\Delta$ 2::LEU2 pdr5::KanMX [pUB100] | P <sub>GPD</sub> -ubiquitin (S65E)                | This study          | Fig. 4A, Fig. 5, Fig. 7 |
| DS208   | BY4742: MAT $\alpha$ his3 $\Delta$ , leu2 $\Delta$ , ura3 $\Delta$ , lys2 $\Delta$                                                                                            | P <sub>CUP1</sub> -6His-myc-ubiquitin             | 1                   | Fig. 6                  |
| DS209   | BY4742: MAT $\alpha$ his3 $\Delta$ , leu2 $\Delta$ , ura3 $\Delta$ , lys2 $\Delta$                                                                                            | P <sub>CUP1</sub> -6His-myc-ubiquitin S65A mutant | This study          | Fig. 6                  |
| DS210   | BY4742: MAT $\alpha$ his3 $\Delta$ , leu2 $\Delta$ , ura3 $\Delta$ , lys2 $\Delta$                                                                                            | P <sub>CUP1</sub> -6His-myc-ubiquitin S65E mutant | This study          | Fig. 6                  |

1. Spence J, Gali RR, Dittmar G, Sherman F, Karin M, Finley D (2000) Cell 102:67-76

2. Swaney DL, Beltrao P, Starita L, Guo A, Rush J, Fields S, Krogan NJ, Villén J (2013) Nature Methods 10(7) 676-682

**Appendix Table S2. The effect of H<sub>2</sub>O<sub>2</sub> stress on ubiquitin signaling.** Log<sub>2</sub>(H<sub>2</sub>O<sub>2</sub>/control) quantifying the response to 5mM H<sub>2</sub>O<sub>2</sub> exposure for global ubiquitin protein, S65 and S57 phosphorylation, and ubiquitin chain abundances. To account for any errors in mixing of cells, all log<sub>2</sub> ratios were normalized such that the median of the lysate protein quantification distribution was centered at log<sub>2</sub> = 0.

| Analyte measured              | Hydrogen peroxide exposure time (min) |       |       |       |
|-------------------------------|---------------------------------------|-------|-------|-------|
|                               | 10                                    | 30    | 90    | 240   |
| Total ubiquitin protein       | -0.01                                 | 0.07  | 0.41  | 0.72  |
| Ubiquitin S65 Phosphorylation | -0.28                                 | 1.16  | 2.75  | 3.85  |
| Ubiquitin S57 Phosphorylation | -0.27                                 | -0.03 | 0.64  | 1.73  |
| K6 ubiquitin chains           | 0.86                                  | 0.87  | 1.17  | 1.27  |
| K11 ubiquitin chains          | 1.45                                  | 2.20  | 2.97  | 3.77  |
| K27 ubiquitin chains          | -0.22                                 | -0.68 | -0.80 | -0.92 |
| K29 ubiquitin chains          | 1.45                                  | 1.49  | 1.87  | 2.41  |
| K33 ubiquitin chains          | 0.99                                  | 0.96  | 1.57  | 2.23  |
| K48 ubiquitin chains          | 2.32                                  | 2.54  | 3.09  | 3.25  |
| K63 ubiquitin chains          | 2.22                                  | 2.82  | 3.35  | 3.76  |

**Appendix Table S3. Enrichment of gene ontology terms in S65E cells.** Ubiquitylation sites from the top 10% most increasing sites in S65E cells vs WT cells were analyzed for gene ontology enrichment as compared to all ubiquitylation sites identified. Analysis was performed using the STRING website.

| Gene ontology ID | Term                                        | Type of process    | NumberOfGenes | p-value  | p-value_bonferroni corrected |
|------------------|---------------------------------------------|--------------------|---------------|----------|------------------------------|
| GO:0002181       | cytoplasmic translation                     | biological process | 26            | 5.53E-20 | 2.22E-16                     |
| GO:0006412       | translation                                 | biological process | 30            | 2.54E-14 | 1.02E-10                     |
| GO:0044267       | cellular protein metabolic process          | biological process | 54            | 3.49E-12 | 1.40E-08                     |
| GO:0019538       | protein metabolic process                   | biological process | 52            | 9.86E-11 | 3.95E-07                     |
| GO:0034645       | cellular macromolecule biosynthetic process | biological process | 37            | 5.91E-06 | 2.37E-02                     |
| GO:0009059       | macromolecule biosynthetic process          | biological process | 37            | 7.47E-06 | 2.99E-02                     |
| GO:0044260       | cellular macromolecule metabolic process    | biological process | 62            | 4.67E-05 | 1.87E-01                     |
| GO:0042254       | ribosome biogenesis                         | biological process | 18            | 9.36E-05 | 3.75E-01                     |
| GO:0006407       | rRNA export from nucleus                    | biological process | 4             | 1.39E-04 | 5.58E-01                     |
| GO:0051029       | rRNA transport                              | biological process | 4             | 1.39E-04 | 5.58E-01                     |
| GO:0003735       | structural constituent of ribosome          | molecular function | 21            | 1.64E-11 | 3.51E-08                     |
| GO:0005198       | structural molecule activity                | molecular function | 21            | 1.47E-06 | 3.15E-03                     |
| GO:0044445       | cytosolic part                              | cellular component | 33            | 2.17E-22 | 1.78E-19                     |
| GO:0022626       | cytosolic ribosome                          | cellular component | 26            | 5.73E-20 | 4.70E-17                     |
| GO:0005829       | cytosol                                     | cellular component | 42            | 8.39E-20 | 6.88E-17                     |
| GO:0022625       | cytosolic large ribosomal subunit           | cellular component | 13            | 2.79E-10 | 2.29E-07                     |
| GO:0044391       | ribosomal subunit                           | cellular component | 20            | 5.71E-10 | 4.68E-07                     |
| GO:0022627       | cytosolic small ribosomal subunit           | cellular component | 11            | 7.22E-10 | 5.92E-07                     |
| GO:0030686       | 90S preribosome                             | cellular component | 10            | 1.22E-05 | 9.99E-03                     |
| GO:0015934       | large ribosomal subunit                     | cellular component | 11            | 1.43E-05 | 1.17E-02                     |
| GO:0015935       | small ribosomal subunit                     | cellular component | 9             | 1.56E-05 | 1.28E-02                     |
| GO:0022624       | proteasome accessory complex                | cellular component | 5             | 9.54E-05 | 7.82E-02                     |
| GO:0005838       | proteasome regulatory particle              | cellular component | 5             | 9.54E-05 | 7.82E-02                     |
| GO:0031597       | cytosolic proteasome complex                | cellular component | 5             | 2.22E-04 | 1.82E-01                     |
| GO:0034515       | proteasome storage granule                  | cellular component | 5             | 2.22E-04 | 1.82E-01                     |
| GO:0030684       | preribosome                                 | cellular component | 10            | 7.92E-04 | 6.49E-01                     |
| sce03010         | Ribosome                                    | KEGG pathway       | 47            | 5.53E-32 | 5.03E-30                     |
| sce03050         | Proteasome                                  | KEGG pathway       | 8             | 2.15E-04 | 1.96E-02                     |

**No enriched Interpro or PFAM domains were identified for these proteins.**
